# Supplementary material for: Complex Immuno-metabolic Profiling Reveals Activation of Cellular Immunity and Biliary Lesion in Patients with Severe COVID-19
Source: Preprints.org preprint supplement (doi:10.20944/preprints202007.0596.v1), 2020-07-24
Supplement: Supplementary file 1 [file supplementary]

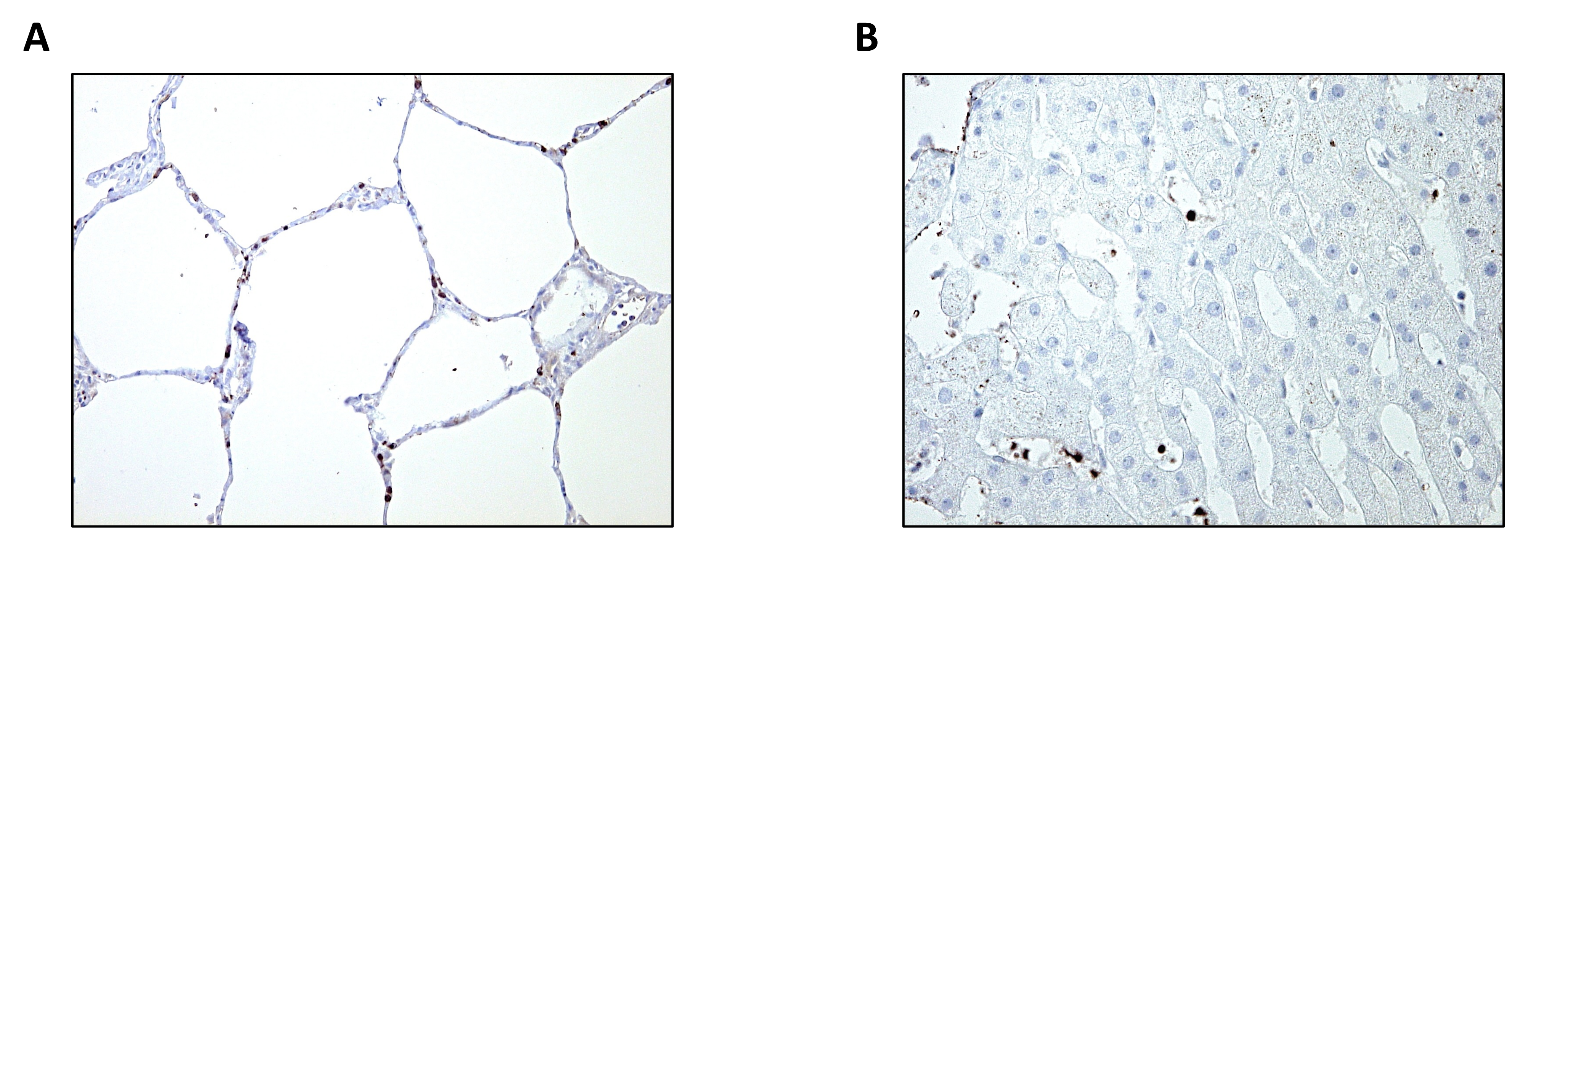


## Supplementary Figure 1 Healthy control biopsy

1. Immunohistochemical staining of IL-6 in a healthy lung biopsy (20x magnification).
2. Immunohistochemical staining of IL-6 in healthy liver biopsy (40x magnification) showing sparse IL-6-producing cells within capillaries of liver lobules.
